# Supplementary material
Source: publisher figshare collection journal article supplement (https://sage.figshare.com/ndownloader/files/14014424)
Supplement: Supplementary file 1 [file 14014424]

**Appendix 1: Pre-Simulation Sonography Survey**
